# Supplementary material for: A Modular System for the Rapid Comparison of Different Membrane Anchors for Surface Display on Escherichia coli
Source: PubMed Central journal article supplement — Chembiochem. 2021 Nov 24;23(2):e202100472. doi: 10.1002/cbic.202100472 (PMC9298812; doi:10.1002/cbic.202100472), 2021-11-24
Supplement: CBIC-23-0-s001.pdf [file CBIC-23-0-s001.pdf]

# ChemBioChem

Supporting Information

**A Modular System for the Rapid Comparison of Different Membrane Anchors for Surface Display on *Escherichia coli***

Sabrina Gallus, Esther Mittmann, and Kersten S. Rabe\*

## Contents

### Materials and Methods

Contains details about plasmid construction and amino acid sequences. Includes the following tables:

|           |                                                                     |
|-----------|---------------------------------------------------------------------|
| Table S1: | Plasmids used in this study                                         |
| Table S2: | Amino acid sequences of functional protein parts used in this study |
| Table S3: | Sequences of primers used in this study                             |

### Supplementary Figures

|            |                                                                                                                                  |
|------------|----------------------------------------------------------------------------------------------------------------------------------|
| Figure S1: | Schematic representation and exemplary data for propidium iodide staining used for the investigation on membrane permeability    |
| Figure S2: | Growth and membrane permeability of <i>E. coli</i> cells expressing SC fused to different membrane anchors after 4h of induction |
| Figure S3: | Growth and membrane permeability of <i>E. coli</i> cells expressing the different membrane anchors without any passenger         |
| Figure S4: | Verification of the membrane-impermeability of the anti-His <sub>6</sub> antibody conjugated to Alexa488                         |
| Figure S5: | Comparison of <i>E. coli</i> cells expressing intracellular SC encoded on a pET-EXPr1 or a pET vector                            |
| Figure S6: | Western blot analysis to verify covalent coupling of BM3-ST to different SC modified membrane anchors                            |
| Figure S7: | Growth of <i>E. coli</i> cells displaying BM3                                                                                    |
| Figure S8: | Microscopy images to investigate on BM3 surface display using immunofluorescence staining                                        |
| Figure S9: | Comparison of BM3 expression levels by western blot                                                                              |

### References

## Materials and Methods

**Plasmid construction.** All plasmids used in this study, their detailed design and their sources are listed in Table S1. All plasmids used for surface display of cytochrome P450 BM3(A74G F87V) (BM3) via the S<sup>3</sup>D or the conventional system were designed with a (glycine)<sub>4</sub>-serine sequence (GGGGS) as a flexible linker between the gene-encoding sequences. To enable analyses by immunostaining, a Myc affinity tag was added to all fusion proteins containing BM3. The Myc tags were separated from the BM3 sequence by a single glycine. The amino acid sequences of all functional protein parts are listed in Table S2. The plasmids listed under “other plasmids” have been used to generate negative control cells with intracellular expression of SC (pET-EXPn1\_his<sub>6</sub>-SC, pET\_SC-his<sub>6</sub>) or to overexpress the mRFP-ST-his<sub>6</sub> probe (pET\_mRFP-ST-his<sub>6</sub>). The amino acids separating the his<sub>6</sub> tag and the SC sequence in plasmid pET-EXPn1\_his<sub>6</sub>-SC, derived from Peschke et al.<sup>[1]</sup>, remained as scars after Gateway cloning.

**Table S1: Plasmids used in this study.** pTF16 based plasmids employed a p15A ori, a chloramphenicol resistance gene and the tight L-arabinose-inducible araB promoter. pET based plasmids employed a pBR322 ori, an ampicillin resistance gene and an IPTG inducible T7 promoter.

| Plasmid                                                                    | Design of genetic construct                                                          | Source                        |
|----------------------------------------------------------------------------|--------------------------------------------------------------------------------------|-------------------------------|
| plasmids used for surface display via S <sup>3</sup> D system              |                                                                                      |                               |
| pTF16_lpp-ompA-SC                                                          |    | Peschke et al. <sup>[1]</sup> |
| pTF16_pgsA-SC                                                              |   | this study                    |
| pTF16_inp <sub>NC</sub> -SC                                                |  | this study                    |
| pTF16_ctxB-SC-AIDA                                                         |  | this study                    |
| pET_BM3-ST-myc                                                             |  | Gallus et al. <sup>[2]</sup>  |
| plasmids used for surface display via conventional system                  |                                                                                      |                               |
| pTF16_lpp-ompA-BM3-myc                                                     |  | Gallus et al. <sup>[2]</sup>  |
| pTF16_pgsA-BM3-myc                                                         |  | this study                    |
| pTF16_inp <sub>NC</sub> -BM3-myc                                           |  | this study                    |
| pTF16_ctxB-myc-BM3-AIDA                                                    |  | this study                    |
| plasmids used for expression of membrane anchors in absence of a passenger |                                                                                      |                               |
| pTF16_lpp-ompA                                                             |  | this study                    |
| pTF16_pgsA                                                                 |  | this study                    |
| pTF16_inp <sub>NC</sub>                                                    |  | this study                    |
| pTF16_ctxB-AIDA                                                            |  | this study                    |

| plasmids used for ST or SC <sub>EQ</sub> controls |  |                                                                                                       |
|---------------------------------------------------|--|-------------------------------------------------------------------------------------------------------|
| pTF16_lpp-ompA-ST                                 |  | Peschke et al. <sup>[1]</sup>                                                                         |
| pTF16_pgsA-ST                                     |  | this study                                                                                            |
| pTF16_inp <sub>NC</sub> -ST                       |  | this study                                                                                            |
| pTF16_ctxB-ST-AIDA                                |  | this study                                                                                            |
| pTF16_lpp-ompA-SC <sub>EQ</sub>                   |  | this study                                                                                            |
| pTF16_pgsA-SC <sub>EQ</sub>                       |  | this study                                                                                            |
| pTF16_inp <sub>NC</sub> -SC <sub>EQ</sub>         |  | this study                                                                                            |
| pTF16_ctxB-SC <sub>EQ</sub> -AIDA                 |  | this study                                                                                            |
| other plasmids                                    |  |                                                                                                       |
| pET_mRFP-ST-his <sub>6</sub>                      |  | *used for overexpression and purification of mRFP-ST-his <sub>6</sub><br>Gallus et al. <sup>[2]</sup> |
| pET-EXPn1_his <sub>6</sub> -SC                    |  | *used for negative control cells with intracellular expression of SC<br>Peschke et al. <sup>[1]</sup> |
| pET_SC-his <sub>6</sub>                           |  | *used to investigate on the influence of vector backbones on cell shape<br>this study                 |

**Table S2: Amino acid sequences of functional proteins parts used in this study.**

| Functional protein                                                                   | Amino acid sequence                                                                                                                                                                                                                                                                                                                                                                                                                                                                                                                                                                                                                                                                                                                                                                                                                                                                                                                                                                                                                            |
|--------------------------------------------------------------------------------------|------------------------------------------------------------------------------------------------------------------------------------------------------------------------------------------------------------------------------------------------------------------------------------------------------------------------------------------------------------------------------------------------------------------------------------------------------------------------------------------------------------------------------------------------------------------------------------------------------------------------------------------------------------------------------------------------------------------------------------------------------------------------------------------------------------------------------------------------------------------------------------------------------------------------------------------------------------------------------------------------------------------------------------------------|
| AIDA-I<br>(linker region: <b>black bold</b> ; $\beta$ -barrel: <i>black italic</i> ) | <b>LNPTKESAGNTLTVSNYGTGPGSVISLGGVLEGDNSLTDRLVVKNGTSGQSDIVYVNE<br/>DGSGGQTRDGINIISVEGNSDAEFLSKNRVVAGAYDYTLQKGNESGTDNKGWYLT<br/>HLPTSDTRQYRPENGSYATNMALANSLFLMDLNERKQFRAMSDNTQPES</b> <i>ASVWMK<br/>ITGGISSGKLNLDGQNKTTTTNQFINQLGGDIYKFHAEQLGDFTLGIMGGYANAKGKTINY<br/>TSNKAARNTLDGYSVGVYGTWYQNGENATGLFAETWMQYNWFNASVKGDGLEEEK<br/>YNLNLGTASAGGGYNLNVHTWTSPEGITGEFWLQPHLQAVWVMGVTDPDTHQEDNGTV<br/>VQAGKNNIQTKAGIRASWVKSTLKDKTGRRFRPYIEANWIHNTHFGVKMSDDSDQ<br/>LLSGSRNQGEIKTGIEGVITQNLVNGGVAYQAGGHGSNAISGALGIKYSF</i>                                                                                                                                                                                                                                                                                                                                                                                                                                                                                                                              |
| P450 BM3(A74G F87V)                                                                  | <i>TIKEMPQPKTFGELKNLPLLNTDKPVQALMKIADDELGEIFKFEAPGRVTRYLSSQRLIKE<br/>ACDESFRDKNLSQGLKFVRDFAGDGLVTSWTHEKNWKAHNILLPSFSQQAMKGYH<br/>AMMVDAVQLVQKWERLNADEHIEVPEDMTRLTLDITGLCGFNRYRFSFYRDQPHPI<br/>TSMVRALDEAMNKLQRANPDDPAYDENKRQFQEDIKVMNDLVDKIADRKASGEQSD<br/>DLLTHMLNGKDPETGEPLDENIRYQITFLIAGHETTSGLLSFALYFLVKNPHVLQKAA<br/>EEAARVLVDPVPSYKQVKQLKYVGMVLNEALRLWPTAPAFSLYAKEDTVLGGEYPLEK<br/>GDELMVLIPQLHRDKTIWGDVVEEFRPERFENPSAIPQHAFKPFNGGQRACIGQQFAL<br/>HEATLVLGMMMLKHDFEDHTNYELDIKETLTLKPEGFVVKAKSKKIPLGGIPSPSTEQSA<br/>KKVRKKAENAHNTPLLVLVYGSNMGTAEGTARDLADIAMSKGFAPQVATLDSHAGNLP<br/>REGAVLIVTASYNHPPDNAKQFVDWLDQASADEVKGVRYSVFGCGDKNWATTYQK<br/>VPAFIDETLAAKGAENIADRGEADASDDFEGTYEWEHMHWSVAAAYFNLDIENSEDN<br/>KSTLSLQFVDSAADMPLAKMHGAFSTNVVASKELQQPGSARSTRHLEIELPKEASYQE<br/>GDHLGVIPRNYEGIVNRVTARFGLDASQIRLEAEKLAHLPLAKTVSVEELLQYVEL<br/>QDPVTRTQLRAMAAKTVCPPHKVELEALLEKQAYKEQVLAKRLTMLELLEKYPACEMK<br/>FSEFIALLPSIRPRYYSISSSPRVDEKQASITVSVVSGEAWSGYGEYKGIASNYLAELQE<br/>GDTITCFISTPQSEFTLPKDPETPLIMVGPVGTGVAPFRGFVQARKQLKEQQQSLGEAHL</i> |

|                                                                                                                                         |                                                                                                                                                                                                                                                                                                                                                                                                             |
|-----------------------------------------------------------------------------------------------------------------------------------------|-------------------------------------------------------------------------------------------------------------------------------------------------------------------------------------------------------------------------------------------------------------------------------------------------------------------------------------------------------------------------------------------------------------|
|                                                                                                                                         | YFGCRSPHEDYLYQEELENAQSEGIITLHTAFSRMPNQPKYVQHVMEQDGKKLIELL<br>DQGAHFYICGDGSQMAPAVEATLMKSYADVHQVSEADARLWLQQLEEKGRYAKDVW<br>AG                                                                                                                                                                                                                                                                                 |
| ctxB SP                                                                                                                                 | MIKLFKFGVFFTVLLSSAYAHG                                                                                                                                                                                                                                                                                                                                                                                      |
| His <sub>6</sub>                                                                                                                        | HHHHHH                                                                                                                                                                                                                                                                                                                                                                                                      |
| INP <sub>NC</sub><br>(INP <sub>N</sub> : <b>black bold</b> ;<br>residual CRD: <i>grey</i> ;<br>INP <sub>C</sub> : <i>black italic</i> ) | <b>TLDKALVLRTCANNMADHCGLIWPASGTVESRYWQSTRRHENGLVGLLWGAGTSA<br/>FLSVHADARWIVCEVAVADIISLEEGPMVKFPRAEVVHVGDRISASHFISARQADPAS<br/>TSTSTSTSTLTPMPTAIPMPMPAVASVTLVPAEQARHEVFDVASVSAAPVNTLPVT<br/>TPQNLQT</b> ATYGSTLSGDNHSRLIAGYGSNETAGNHSDLIGGHDCITLMAGDQSRLTAG<br>KNSVLTAGARSKLIGSEGSTLSAGEDSTLI <i>FRLWDGKRYRQLVARTGENGV EADIPYY<br/>VNEDDDIVDKPDEDDDWIEVK</i>                                                 |
| Lpp-OmpA<br>(Lpp: <b>black bold</b> ;<br>OmpA: <i>black italic</i> )                                                                    | <b>KATKLVLGAVILGSTLLAGCSSNAKIDQG</b> <i>INPYVGFEMGYDWLGRMPYKGSVENGA<br/>YKAQGVQLTAKLGYPTDDLDIYTRLGGMVWRADTKSNVYGKNHDTGVSPVFAGGVE<br/>YAITPEIATRLEYQWTNNIGDAHTIGTRPDNGV</i>                                                                                                                                                                                                                                  |
| mRFP                                                                                                                                    | ASSEDVIKEFMRFKVMEGSVNGHEFEIEGEGEGRPYEGTQTAKLKVTKGGPLPFAW<br>DILSPQFQYGSKAYVKHPADIPDYLKLSFPEGFKWERVMNFEDGGVVTVTQDSSLQD<br>GEFIYKVKLRGTNFPDGPVMQKKTMGWEASTERMYPEDGALKGEIKMRLKLDGGH<br>YDAEVKTTYMAKKPVQLPGAYKTDIKLDITSHNEDYTIVEQYERAEGRHSTGA                                                                                                                                                                   |
| Myc                                                                                                                                     | EQKLISEEDL                                                                                                                                                                                                                                                                                                                                                                                                  |
| PgsA                                                                                                                                    | KKELSFHEKLLKLTQKQKKTNKHVFIPIVFLMFAFMWAGKAETPKVKTYSDVLSA<br>SFVGDIMMGRYVEKVTQKQKADSIQYVEPIFRASDYVAGNFENPVTYQKNYKQADKE<br>IHLQTNKESVKVLKDMNFTVLNSANNHAMDYGVQGMKDTLGEFAKQNLDIVGAGYSL<br>SDAKKKISYQKVNVTIATLGFDTVSGKGF AAKKNTPGVLPADPEIFIPMISEAKKHADI<br>VVVQSHWGQYDNDPNDRQRQLARAMSDAGADIIVGHHPHVLEPIEVNGTVIFYSL<br>GNFVFDQGWTRTRDSALVQYHLKKNGTGRFEVTPIDIHEATPAPVKKDSLKQKTIIREL<br>TKDSNFAWKVEDGKLTDFDIDHSDKLSK |
| SpyTag                                                                                                                                  | AHIVMVDAYKPTK                                                                                                                                                                                                                                                                                                                                                                                               |
| SpyCatcher                                                                                                                              | VDTLSGLSSEQGQSGDMTIEEDSATHIKFSKRDEDGKELAGATMELRDSSGKTISTWI<br>SDGQVKDFYLYPGKYTFVETAAPDGYEVATAITFTVNEQGQVTVNGKATKGAHI                                                                                                                                                                                                                                                                                        |
| SpyCatcher(E77Q)                                                                                                                        | VDTLSGLSSEQGQSGDMTIEEDSATHIKFSKRDEDGKELAGATMELRDSSGKTISTWI<br>SDGQVKDFYLYPGKYTFVQTAAPDGYEVATAITFTVNEQGQVTVNGKATKGAHI                                                                                                                                                                                                                                                                                        |

Unless otherwise stated, plasmids constructed in this study were generated using the isothermal recombination as described by Gibson et al.<sup>[3]</sup> PCR-products or synthetic DNA-fragments were inserted into linearized vector backbones via 19-30 base pair homologous sequence overlaps. The sequences of all primers utilized for the PCR amplifications are listed in Table S3. The assembly reaction was performed at 50 °C for 1 h under continuous shaking. Subsequently, the reaction mixtures were treated with DpnI to remove any remaining vector from prior PCR reactions and transformed into chemical competent *E. coli* DH5 $\alpha$  cells and selected on LB-agar plates containing 100  $\mu$ g/ml ampicillin or 30  $\mu$ g/ml chloramphenicol at 37 °C for at least 12 h. All plasmids were purified using ZR Plasmid Miniprep-Classic (Zymo Research) according to the manufacturer's instructions. Plasmid Sequences were verified by commercial sequencing (LGC genomics).

**pTF16\_pgsA-SC.** A pTF16 backbone employing a C-terminal SC was amplified using primers SG42 and SG43 with pTF16\_lpp-ompA-SC as the template. This backbone was then recombined with an insert encoding for PgsA, which was ordered as a codon-optimized gene fragment (GeneArt Gene Synthesis, Thermo Fisher Scientific).

**pTF16\_inp<sub>NC</sub>-SC.** A pTF16 backbone employing a C-terminal SC was amplified using primers SG42 and SG43 with pTF16\_lpp-ompA-SC as the template. This backbone was then recombined with an insert encoding for INP<sub>NC</sub>, which was ordered as a codon-optimized gene fragment (GeneArt Gene Synthesis, Thermo Fisher Scientific).

**pTF16\_ctxB-SC-AIDA.** An empty pTF16 backbone was amplified using primers SG43 and SG44 with pTF16\_lpp-ompA-SC as the template. This backbone was then recombined with an insert encoding for a fusion protein consisting of a ctxB signal peptide, SC and AIDA-I, which was ordered as a codon-optimized gene fragment (GeneArt Gene Synthesis, Thermo Fisher Scientific).

**pTF16\_pgsA-BM3-myc.** Template pTF16\_pgsA-SC was amplified using primers SG61 and SG98, generating a pTF16 backbone employing a N-terminal PgsA and a C-terminal partial Myc tag that was inserted with the SG61 primer. This backbone was then recombined with an insert encoding for P450 BM3(A74G F87V) fused to the missing part of the C-terminal Myc tag, which had been generated by amplification of the template pET\_BM3-ST-his<sub>6</sub><sup>[2]</sup> using the primers SG99 and SG100 with SG100 inserting the partial Myc tag sequence.

**pTF16\_inp<sub>NC</sub>-BM3-myc.** Template pTF16\_inp<sub>NC</sub>-SC was amplified using primers SG61 and SG170, generating a pTF16 backbone employing a N-terminal INP<sub>NC</sub> and a C-terminal partial Myc tag that was inserted with the SG61 primer. This backbone was then recombined with an insert encoding for P450 BM3(A74G F87V) fused to the missing part of the C-terminal Myc tag, which had been generated by amplification of the template pET\_BM3-ST-his<sub>6</sub><sup>[2]</sup> using the primers SG100 and SG171 with SG100 inserting the partial Myc tag sequence.

**pTF16\_ctxB-myc-BM3-AIDA.** Template pTF16\_ctxB-SC-AIDA was amplified using primers SG65 and SG83, generating a pTF16 backbone employing a C-terminal AIDA-I and a N-terminal ctxB signal peptide fused to a partial Myc tag that was inserted with the SG65 primer. This backbone was then recombined with an insert encoding for P450 BM3(A74G F87V) fused to the missing part of the N-terminal Myc tag, which had been generated by amplification of the template pET\_BM3-ST-his<sub>6</sub><sup>[2]</sup> using the primers SG81 and SG82 with SG81 inserting the partial Myc tag sequence.

**pTF16\_lpp-ompA.** Template pTF16\_lpp-ompA-SC was amplified using primers KSR227-for and SG175 to delete the SC sequence.

**pTF16\_pgsA.** Template pTF16\_pgsA-SC was amplified using primers KSR227-for and SG174 to delete the SC sequence.

**pTF16\_inp<sub>NC</sub>.** Template pTF16\_inp<sub>NC</sub>-SC was amplified using primers KSR227-for and SG176 to delete the SC sequence.

**pTF16\_ctxB-AIDA.** Template pTF16\_ctxB-SC-AIDA was amplified using primers SG177 and SG178 to delete the SC sequence.

**pTF16\_pgsA-ST.** Template pTF16\_pgsA-SC was amplified using primers SG51 and SG52, which each contained partial ST sequences with homologous overlaps, to delete the SC sequence and replace it by the ST sequence.

**pTF16\_inp<sub>NC</sub>-ST.** Template pTF16\_inp<sub>NC</sub>-SC was amplified using primers SG51 and SG53, which each contained partial ST sequences with homologous overlaps, to delete the SC sequence and replace it by the ST sequence.

**pTF16\_ctxB-ST-AIDA.** Template pTF16\_ctxB-SC-AIDA was amplified using primers SG54 and SG55, which each contained partial ST sequences with homologous overlaps, to delete the SC sequence and replace it by the ST sequence.

**pTF16\_lpp-ompA-SC<sub>EQ</sub> / pTF16\_pgsA-SC<sub>EQ</sub> / pTF16\_inp<sub>NC</sub>-SC<sub>EQ</sub> / pTF16\_ctxB-SC<sub>EQ</sub>-AIDA.** Templates pTF16\_lpp-ompA-SC, pTF16\_pgsA-SC, pTF16\_inp<sub>NC</sub>-SC or pTF16\_ctxB-SC-AIDA were amplified using primers SG172 and SG173 to introduce SC mutation E77Q by site-directed mutagenesis.

**pET\_SC-his<sub>6</sub>.** Template pET\_PAD-SC-his<sub>6</sub><sup>[4]</sup> was amplified using primers SEB01 and KSR65-rev to delete the PAD sequence.

**Table S3: Sequences of primers used in this study.**

| Primer     | Sequence (5' → 3')                                            |
|------------|---------------------------------------------------------------|
| KSR65-rev  | ATGTATATCTCCTTCTTAAAGTTAAAC                                   |
| KSR227-for | TGAGATCCGGCTGCTAACAAAGCCC                                     |
| SEB01      | AAGAAGGAGATATACATATGGTTGATACCCTGAGCGGTCTGAGC                  |
| SG42       | GGTGGTGGTGGTAGCGTTGATAC                                       |
| SG43       | ATGTATATCTCCTTCTTAAAGTTAAACAAAATTC                            |
| SG44       | TGAGATCCGGCTGCTAACAAAGC                                       |
| SG51       | TTATGGTTGATGCCTATAAACCGACCAAATAATGAGATCCGGCTGCTAACAAAGCCC     |
| SG52       | TTATAGGCATCAACCATAACAATATGTGCGCTACCACCACCACCTTTGCTTTTC        |
| SG53       | TTATAGGCATCAACCATAACAATATGTGCGCTACCACCACCACCTTTCACCTC         |
| SG54       | TTATGGTTGATGCCTATAAACCGACCAAAGGTGGTGGTGGTAGCCTGAATCC          |
| SG55       | TTATAGGCATCAACCATAACAATATGTGCACCATGTGCATATGCGCTGCTCAG         |
| SG61       | CAGAAACTGATCAGCGAAGAAGATCTGTAATGAGATCCGGCTGCTAACAAAGC         |
| SG65       | CAGATCTTCTTCGCTGATCAGTTTCTGTTACCACATGTGCATATGCGCTGCTC         |
| SG66       | GTTGCAGAAAATCAAGGTCATCATCATCACCATCACTAAG                      |
| SG81       | CAGAAACTGATCAGCGAAGAAGATCTGGGCACAATTAAGAAATGCCTCAGCCAAAAAC    |
| SG82       | TTTGGTCGGATTCAGGCTACCACCACCACCCCCAGCCCACACGTCTTTTGC           |
| SG83       | GGTGGTGGTGGTAGCCTGAATC                                        |
| SG98       | GCTACCACCACCACCTTTGCTTTTC                                     |
| SG99       | AAACTGAAAAGCAAAGGTGGTGGTGGTGGTAGCACAATTAAGAAATGCCTCAGCCAAAAAC |
| SG100      | CTTCGCTGATCAGTTTCTGTTACCCCCAGCCCACACGTCTTTTGC                 |
| SG170      | GCTACCACCACCACCTTTCACC                                        |
| SG171      | TGGATCGAGGTGAAAGGTGGTGGTGGTGGTAGCACAATTAAGAAATGCCTCAGCCAAAAAC |
| SG172      | GCAAATACACCTTTGTTCCAGACCGCAGC                                 |
| SG173      | CAAAGGTGTATTTGCCAGGGTACAG                                     |
| SG174      | CAGCCGGATCTCATTTGCTTTTCAGTTTATCGCTATGATCGATATCAAAG            |
| SG175      | CAGCCGGATCTCACACACCATTATCCGGACGGGTGC                          |
| SG176      | CAGCCGGATCTCATTTACCTCGATCCAATCATCATCTTCATCC                   |
| SG177      | GCATATGCACATGGTCTGAATCCGACCAAAGAAAGCGCAG                      |
| SG178      | ACCATGTGCATATGCGCTGCTCAGC                                     |

## Supplementary Figures

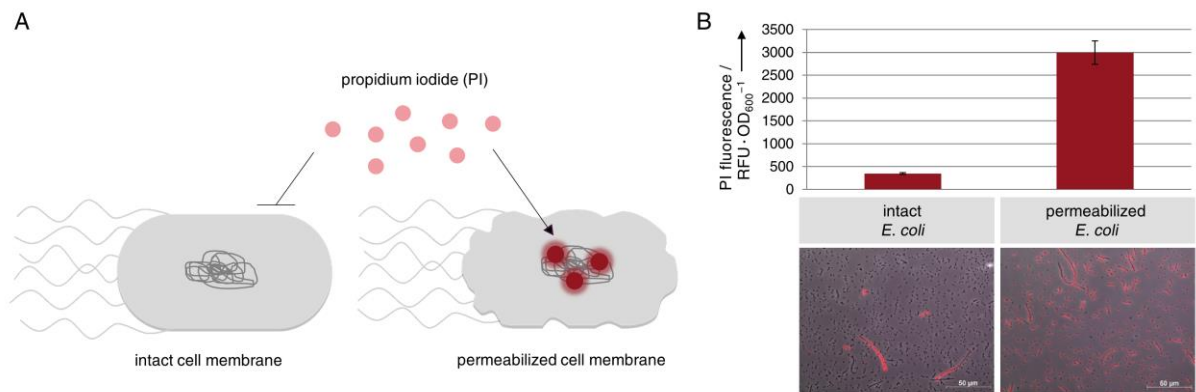

**Figure S1.** Investigation of membrane permeability by propidium iodide (PI) staining. **(A)** PI is a fluorescent dye not able to penetrate into the cell membrane of intact *E. coli* cells. However, if the cell membrane is permeabilized, the dye can penetrate the cell and intercalate into the DNA, shifting its excitation and emission wavelengths and increasing the fluorescence intensity by 20 to 30 times. The fluorescence of the DNA bound PI can be quantified with a microplate reader ( $\lambda_{Ex}=535$  nm,  $\lambda_{Em}=617$  nm) or visualized using a rhodamine filter set on a fluorescence microscope. **(B)** Exemplary PI fluorescence quantification and corresponding microscopy images of intact and permeabilized *E. coli* cells. *E. coli* BL21 were cultured for 4 h at 37 °C and stained with PI directly (intact *E. coli*) or after permeabilization by incubation with 2% toluene for 30 min at room temperature (permeabilized *E. coli*). Error bars were obtained from at least two independent experiments.



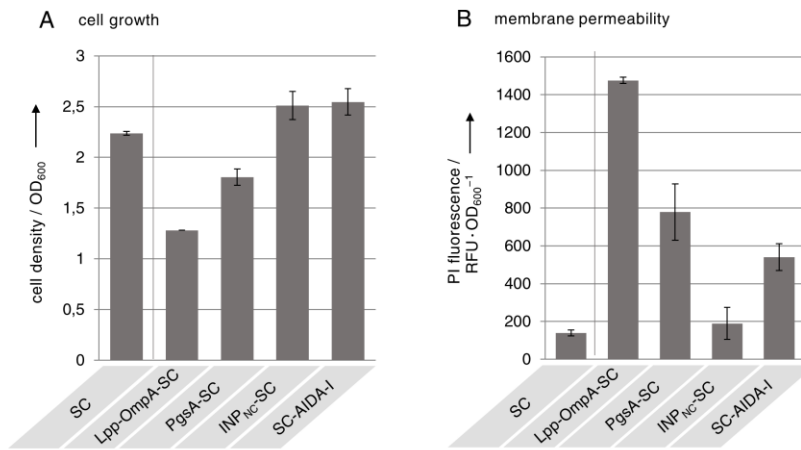

**Figure S2.** Growth and membrane permeability of *E. coli* cells expressing SC intracellularly or fused to the membrane anchors Lpp-OmpA, PgsA, INP<sub>NC</sub> or AIDA after 4h of induction. **(A)** Density of cell cultures determined by measuring the OD<sub>600</sub>. **(B)** Permeability of the cell membrane determined by incubation with the membrane impermeable DNA intercalating dye propidium iodide (PI). A high PI fluorescence signal is related to increased membrane permeability. Details about the staining procedure are given in Figure S1. Error bars were obtained from at least two independent experiments.

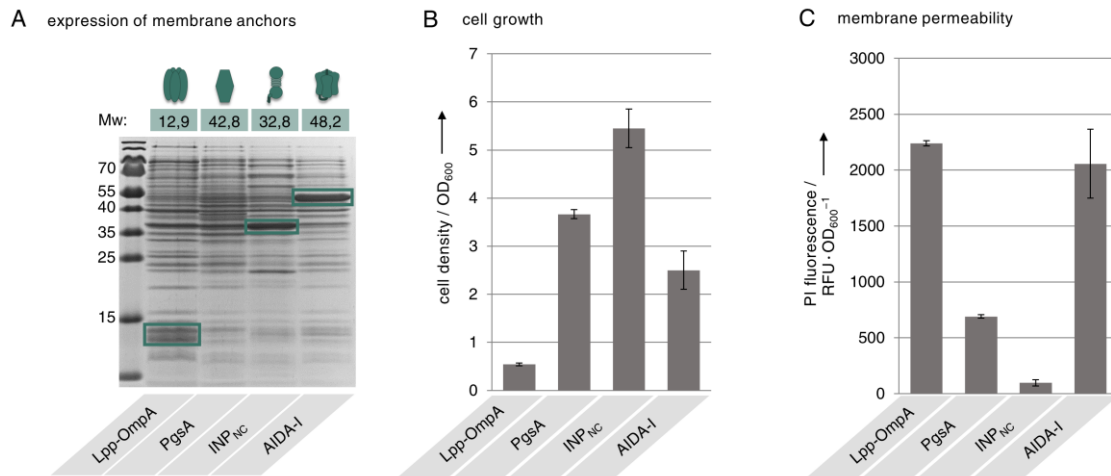

**Figure S3.** Protein expression, growth and membrane permeability of *E. coli* cells expressing the different membrane anchors in absence of any passenger domain. Cells were analyzed 20 h after of induction of protein expression. **(A)** Total protein fractions separated by Coomassie stained SDS-PAGE (15% (w/v) acrylamide). The expected molecular weight (Mw) of each protein as well as the molecular weight of marker bands is given in kDa. The bands of the detected proteins are outlined in green. Similar to the SC modified membrane anchors (see Figure 2), expression of PgsA was lowest among all tested membrane anchors and appeared to be too low to detect a clear protein band. **(B)** Density of cell cultures determined by measuring the OD<sub>600</sub>. **(C)** Permeability of the cell membrane determined by incubation with the membrane impermeable DNA intercalating dye propidium iodide (PI). A high PI fluorescence signal is related to increased membrane permeability. Details about the staining procedure are given in Figure S1. Error bars were obtained from at least two independent experiments.

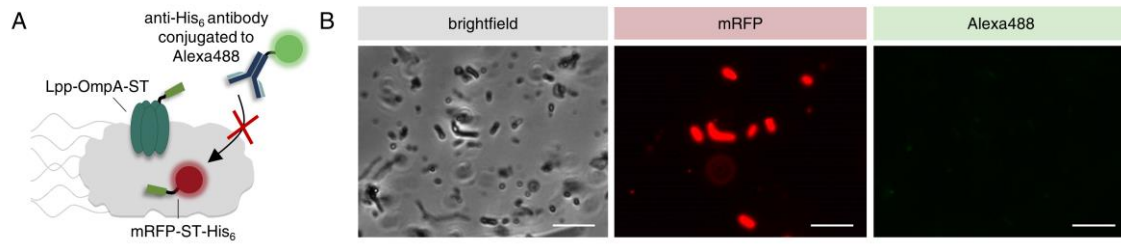

**Figure S4.** Verification of the membrane-impermeability of the anti-His<sub>6</sub> antibody conjugated to Alexa488. **(A)** *E. coli* cells were transformed with plasmids pTF16\_lpp-ompA-ST and pET\_mRFP-ST-his<sub>6</sub> and were incubated for 20 h after induction to express membrane integrated Lpp-OmpA-ST and cytosolic mRFP-ST-his<sub>6</sub>. The cells were incubated with the anti-his<sub>6</sub> antibody conjugated to Alexa488 for 1 h at room temperature, washed three times with PBS buffer and subsequently analyzed using fluorescence microscopy. **(B)** A clear mRFP fluorescence was detected indicating that the cells express a high amount of cytosolic mRFP-ST-His<sub>6</sub>. However, the cells did not exhibit any Alexa488 fluorescence, demonstrating that the antibody cannot bind to the cytosolic mRFP-ST-his<sub>6</sub>, even though expression of the Lpp-OmpA membrane anchor was shown to cause a high degree of membrane permeabilization (see Figure 2C). Scale bars correspond to 10  $\mu$ m.

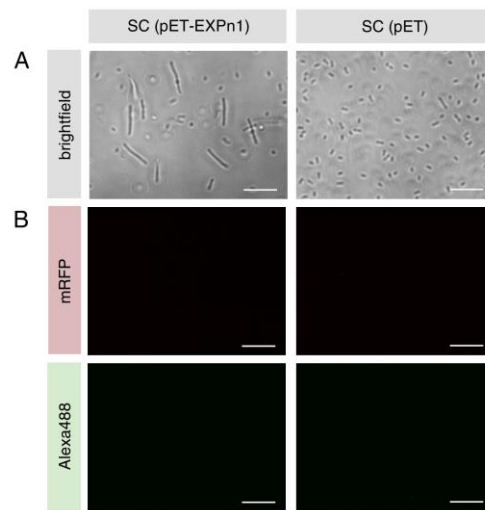

**Figure S5.** Comparison of *E. coli* cells expressing intracellular SC encoded on a pET-EXPn1 or a pET vector. In this study the intracellular SC was expressed using our previously described plasmid pET-EXPn1<sub>his<sub>6</sub></sub>-SC<sup>(1)</sup>, based on pET-DEST42 (Thermo Fisher Scientific), to ensure comparability with previous studies. In order to investigate on the impact of an alternative plasmid backbone, the pET22b(+) (Novagen) based vector pET\_SC-his<sub>6</sub> was constructed and analyzed. **(A)** Microscopic images of cells expressing intracellular SC encoded on the pET-EXPn1 plasmid (left side, elongated cell shape) or on the pET plasmid (right side, round cell shape) indicate that the plasmid backbone has an influence on cell shape. **(B)** However, as expected, incubation of the cells with mRFP-ST-his<sub>6</sub> and subsequent staining with the membrane-impermeable Alexa488 conjugated anti-his<sub>6</sub> antibody, as conducted in Figure 3 for detection of functional and surface presented SC domains, resulted in no detectable mRFP or Alexa488 fluorescence for both plasmids. This demonstrates that the plasmids are equally suited to produce control cells with intracellular expression of SC as shown in Figure 3. Scale bars correspond to 10  $\mu$ m.

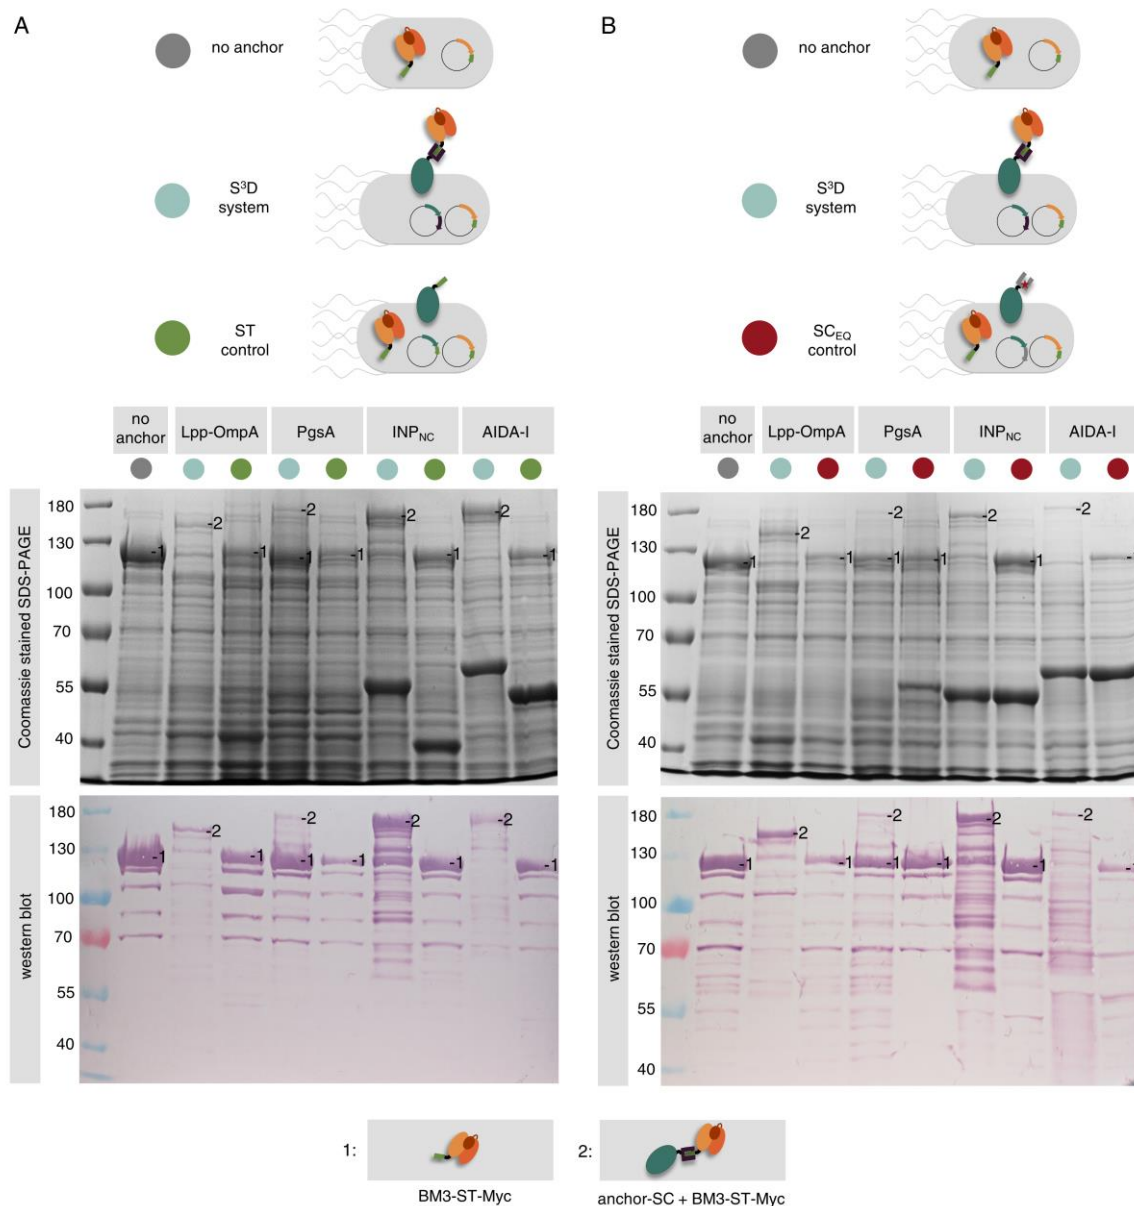

**Figure S6.** Western blot analysis to verify the covalent coupling of BM3-ST to different SC modified membrane anchors. Cells expressing BM3-ST intracellularly (no anchor, grey dots) were compared to cells expressing BM3-ST together with the different SC modified membrane anchors (S<sup>3</sup>D system, light blue dots). As controls, we analyzed cells expressing BM3-ST together with each membrane anchor fused to either ST (A, ST control, green dots) or to an inactivated SC<sub>EQ</sub>, in which formation of the covalent isopeptide bond is prevented by the mutation E77Q (B, SC<sub>EQ</sub> control, red dots). All cells were analyzed 20 h after induction. Total protein fractions were separated by SDS-PAGE (8% (w/v) acrylamide) and stained with Coomassie or transferred to a PVDF membrane for western blot detection of a terminal Myc Tag on BM3-ST using primary mouse anti-Myc antibodies and secondary anti-mouse antibodies conjugated to alkaline phosphatase. For all control cells (grey, green or red dots) only one protein band (1) corresponding to the full-length BM3-ST was detected. In contrast, a higher molecular weight band (2) was detected for all cells employing the S<sup>3</sup>D system (light blue dots), thereby confirming covalent conjugation of BM3-ST to all SC modified membrane anchors Lpp-OmpA, PgsA, INP<sub>NC</sub> and AIDA-I. Note that several lower molecular weight bands were detected for all samples presumably caused by degradation of the BM3-ST passenger and/or its corresponding conjugates. Expected molecular weight of proteins bands: BM3-ST (1): 120 kDa; anchor-SC + BM3-ST (2): 148 kDa (for Lpp-OmpA anchor), 175 kDa (for PgsA anchor), 165 kDa (for INP<sub>NC</sub> anchor) or 180 kDa (for AIDA-I anchor). Molecular weight of marker bands is given in kDa.

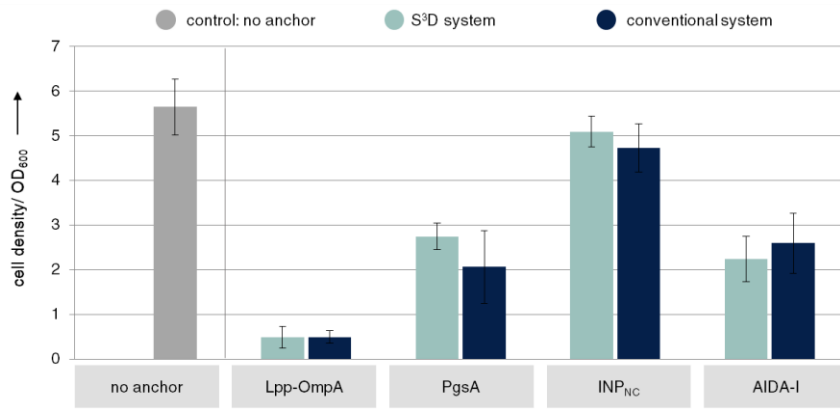

**Figure S7.** Growth of *E. coli* cells expressing BM3-ST intracellularly (no anchor control, grey) compared to cells displaying BM3 with the S<sup>2</sup>D system (light blue) or with the conventional system (dark blue) employing different membrane anchors. Error bars were obtained from at least two independent experiments.

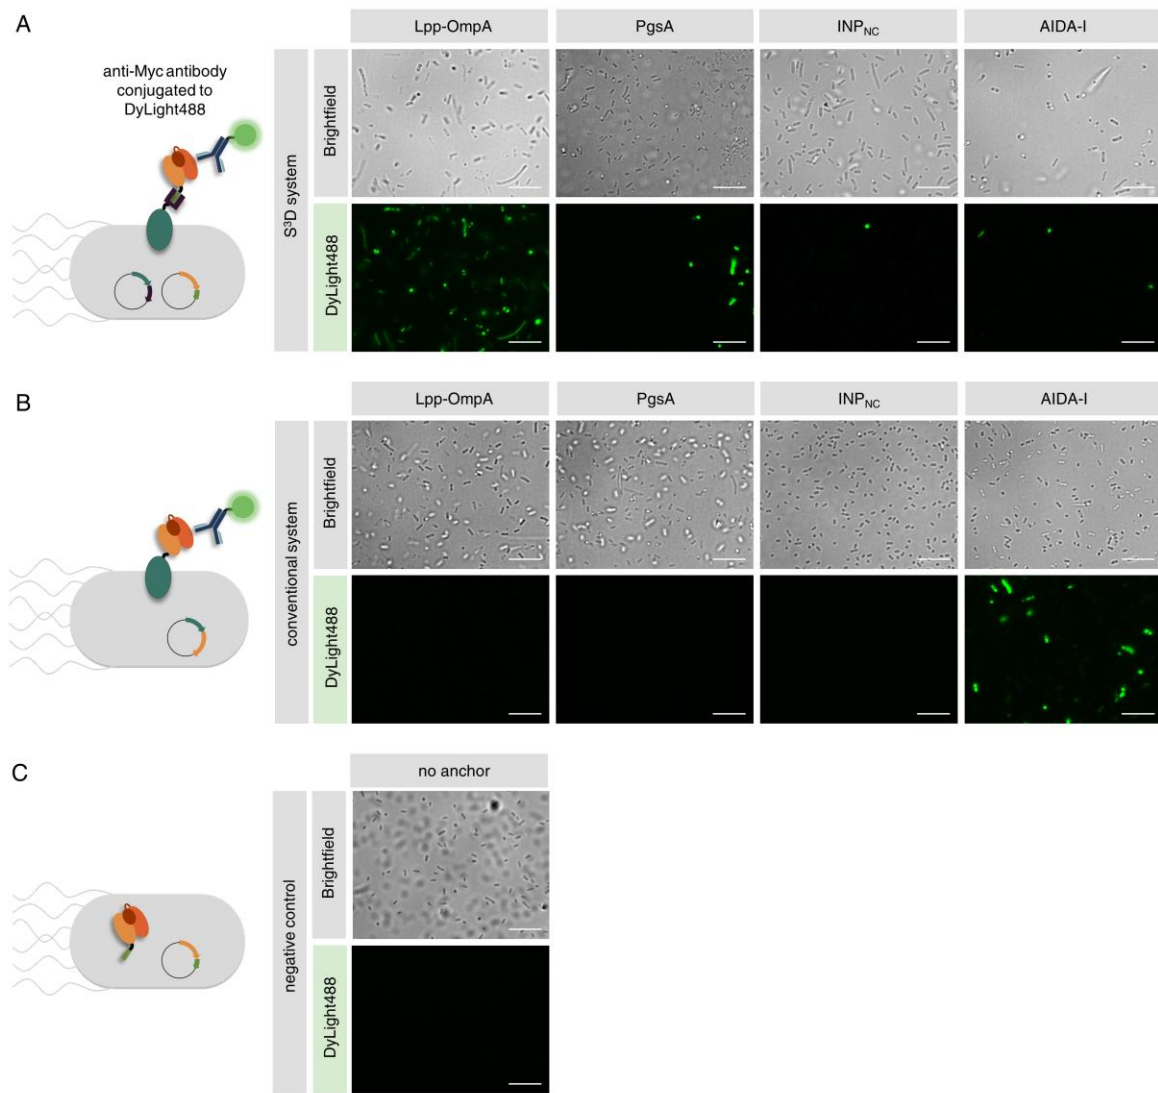

**Figure S8.** Microscopy images of immunofluorescence staining used to investigate on the BM3 surface exposure employing different membrane anchors for the S<sup>3</sup>D system (**A**) or for the conventional system (**B**). As a negative control cells expressing intracellular BM3-ST were analyzed (**C**). BM3 was modified with a terminal Myc tag and detected using an anti-Myc antibody conjugated to DyLight488. Scale bars correspond to 10  $\mu$ m.

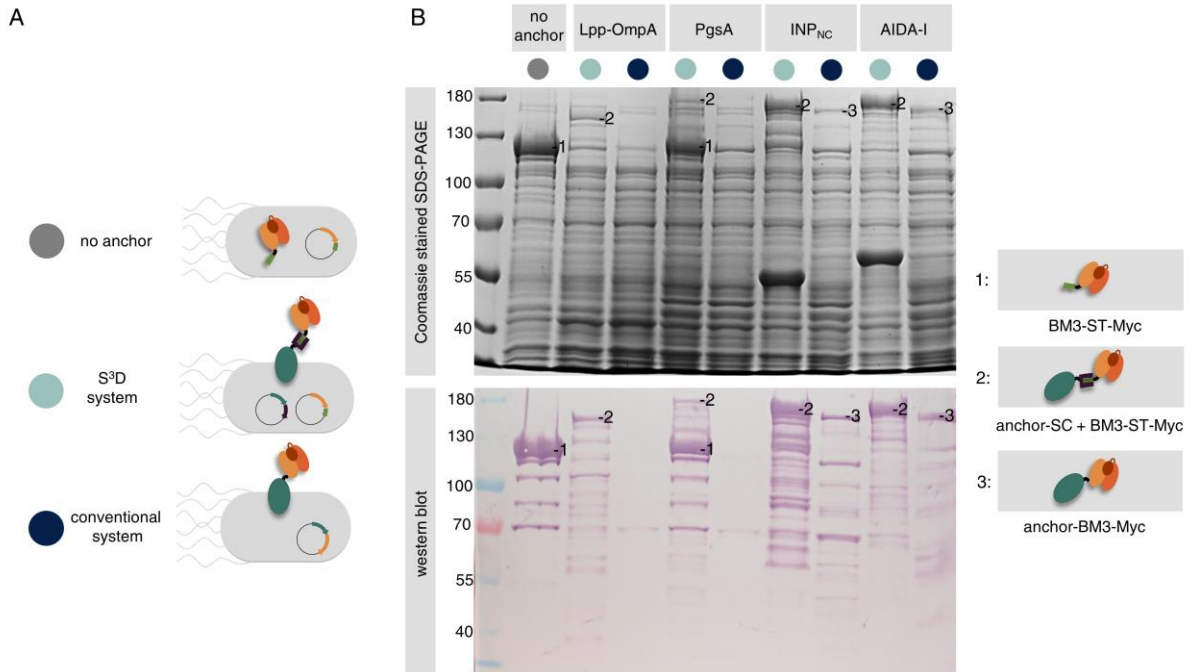

**Figure S9.** Comparison of BM3 expression levels by western blot. **(A)** Control cells expressing BM3-ST intracellularly (grey) were compared to cells displaying BM3 with the S<sup>3</sup>D system (light blue) or with the conventional system (dark blue) employing different membrane anchors. All cells were analyzed 20 h after induction. **(B)** Total protein fractions were separated by SDS-PAGE (8% (w/v) acrylamide) and stained with Coomassie or transferred to a PVDF membrane for western blot detection of a terminal Myc Tag on BM3 fusion proteins using primary mouse anti-Myc antibodies and secondary anti-mouse antibodies conjugated to alkaline phosphatase. Note that using the conventional system no expression was observed for the fusion proteins Lpp-OmpA-BM3 or PgsA-BM3. Expected molecular weights of proteins bands: BM3-ST (1): 120 kDa; anchor-SC + BM3-ST (2): 148 kDa (for Lpp-OmpA), 175 kDa (for PgsA), 165 kDa (for INP<sub>NC</sub>) or 180 kDa (for AIDA-I); anchor-BM3 (3): 134 kDa (for Lpp-OmpA), 162 kDa (for PgsA), 152 kDa (for INP<sub>NC</sub>) or 167 kDa (for AIDA-I). Several lower molecular weight bands were detected presumably caused by degradation of the BM3 fusion proteins. Molecular weight of marker bands is given in kDa.



## References

- [1] T. Peschke, K.S. Rabe, C.M. Niemeyer. Orthogonal surface tags for whole-cell biocatalysis. *Angew. Chem., Int. Ed. Engl.* **2017**;56(8):2183–6. <https://doi.org/10.1002/anie.201609590>.
- [2] S. Gallus, T. Peschke, M. Paulsen, T. Burgahn, C.M. Niemeyer, K.S. Rabe. Surface Display of Complex Enzymes by in Situ SpyCatcher-SpyTag Interaction. *ChemBioChem* **2020**;21(15):2126–31. <https://doi.org/10.1002/cbic.202000102>.
- [3] D.G. Gibson, L. Young, R.-Y. Chuang, J.C. Venter, C.A.3. Hutchison, H.O. Smith. Enzymatic assembly of DNA molecules up to several hundred kilobases. *Nat. Methods* **2009**;6(5):343–5. <https://doi.org/10.1038/nmeth.1318>.
- [4] E. Mittmann, S. Gallus, P. Bitterwolf, C. Oelschlaeger, N. Willenbacher, C.M. Niemeyer, K.S. Rabe. A Phenolic Acid Decarboxylase-Based All-Enzyme Hydrogel for Flow Reactor Technology. *Micromachines (Basel)* **2019**;10(12). <https://doi.org/10.3390/mi10120795>.
